# Supplementary material
Source: Research Square preprint supplement (doi:10.21203/rs.3.rs-9622101/v1)
Supplement: Supplementary file 1 [file 11caf82eea8379551ea7d520.docx]

**Supplementary Figures 1-10: Cross-stratification heatmaps demonstrating the combined influence of Body Mass Index (BMI) and De Ritis (AST/ALT) ratio on serum lipid profiles and NMR-derived lipoprotein subfraction concentrations.** Each cell displays the mean concentration of the respective biomarker within a specific intersection of standard WHO BMI categories (y-axis) and predefined De Ritis ratio intervals (x-axis). The color gradient visually maps the magnitude of these mean concentrations, with warmer colors (red/orange) indicating higher values and cooler colors (green/yellow) representing lower values. Blank cells denote subgroup combinations with no or insufficient data points.


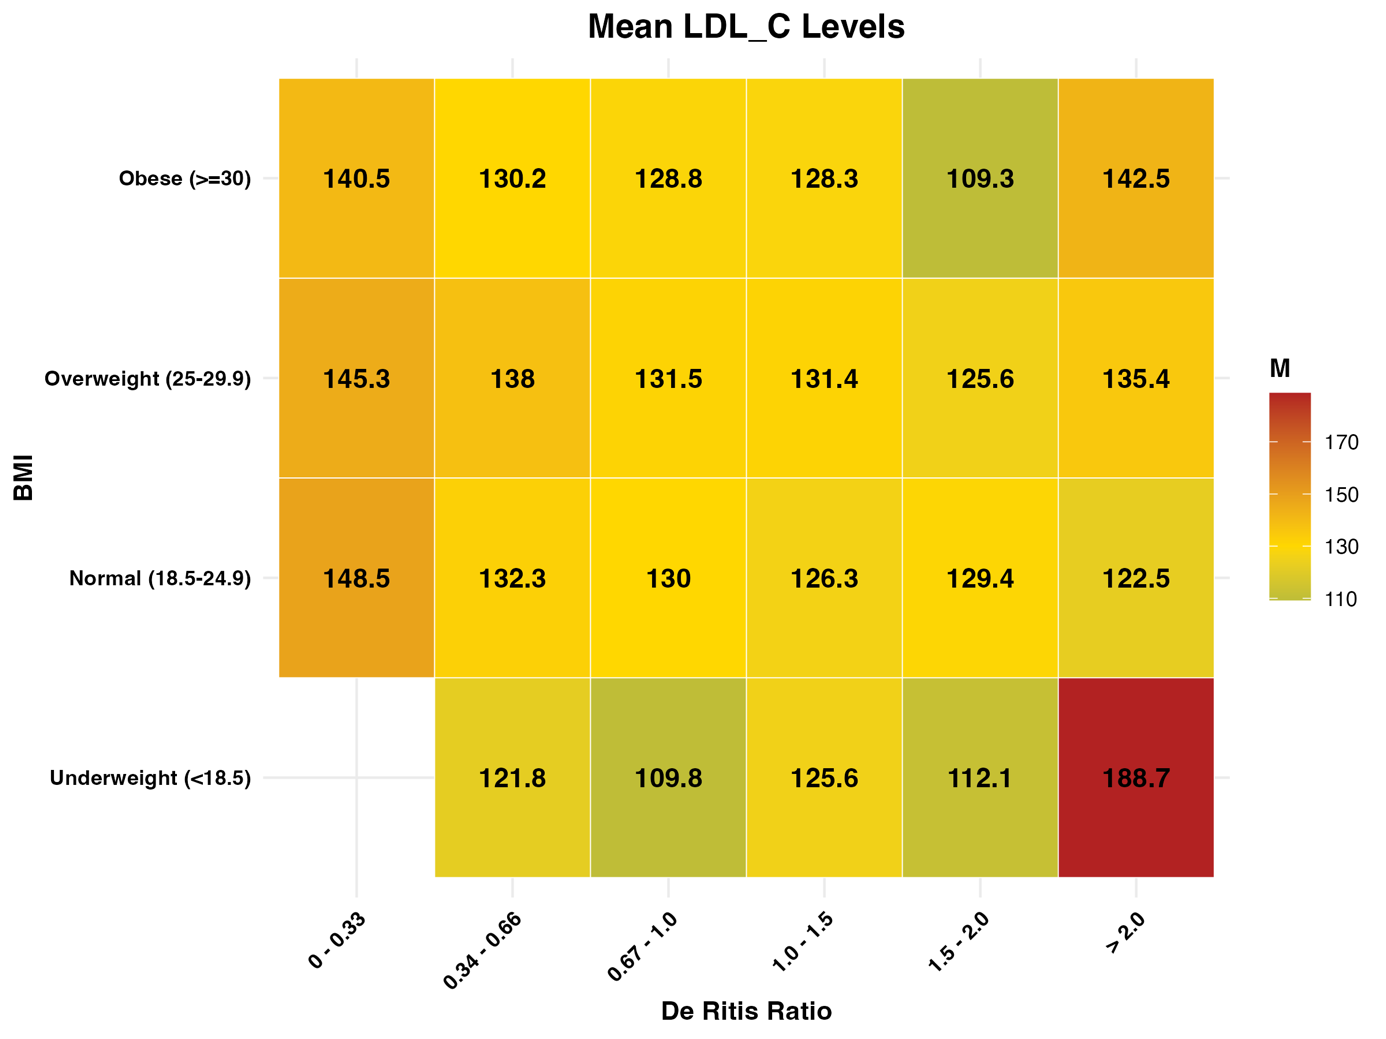


**Supplementary Figure 1.** Mean Low-Density Lipoprotein Cholesterol (LDL-C) levels.


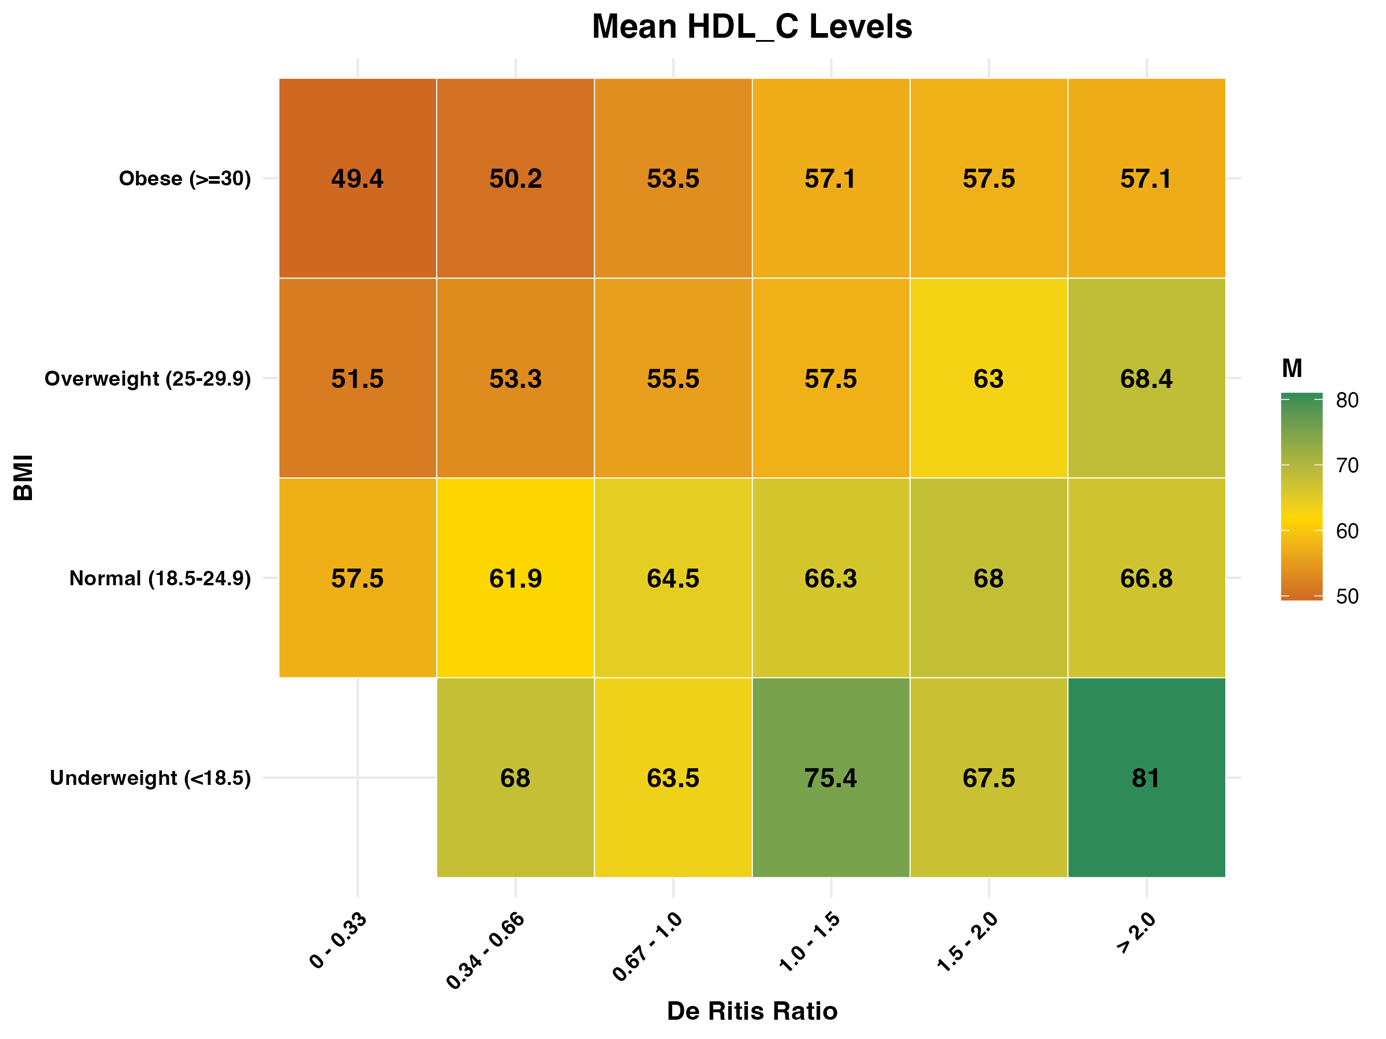


**Supplementary Figure 2.** Mean High-Density Lipoprotein Cholesterol (HDL-C) levels.


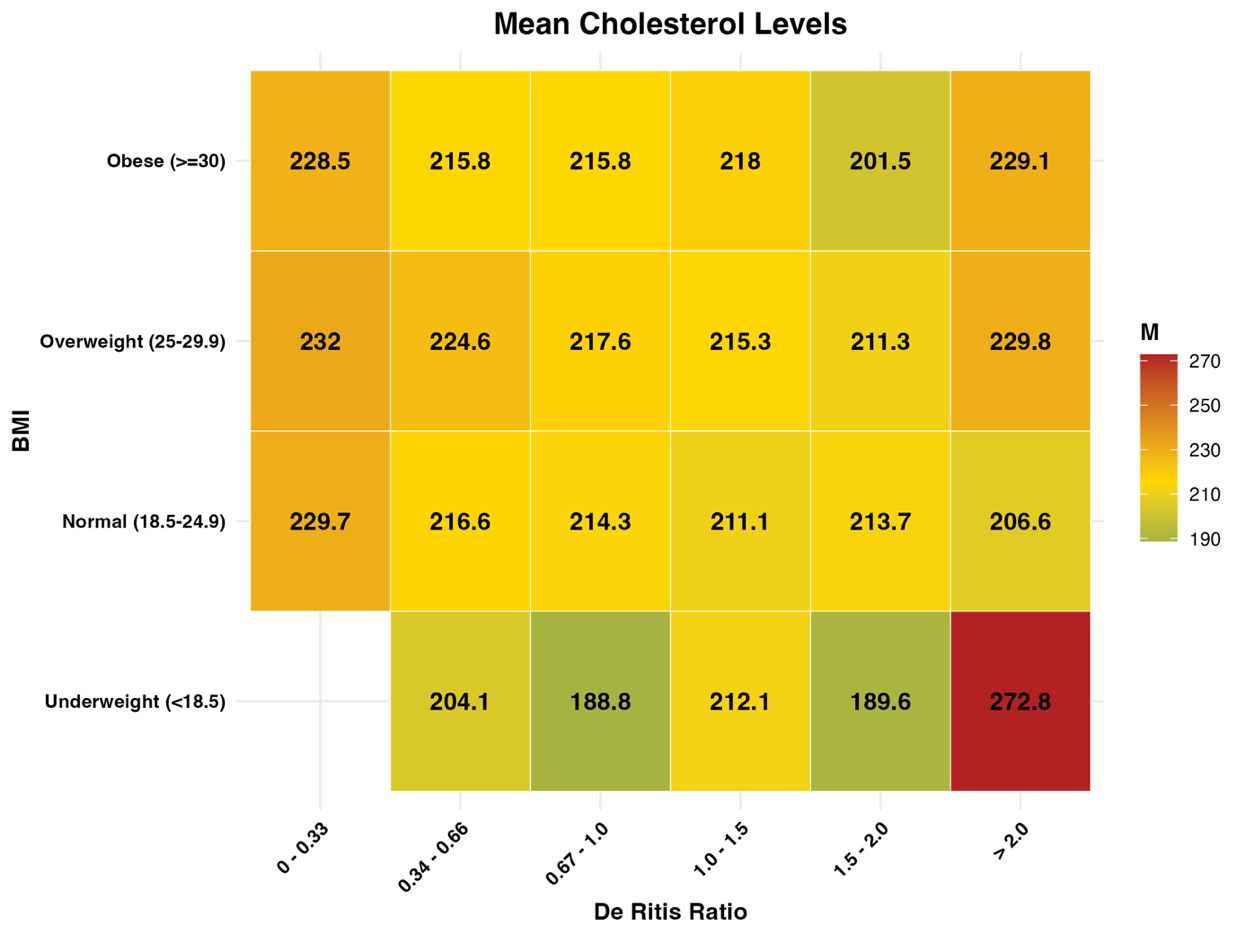
**Supplementary Figure 3.** Mean Total Cholesterol levels.


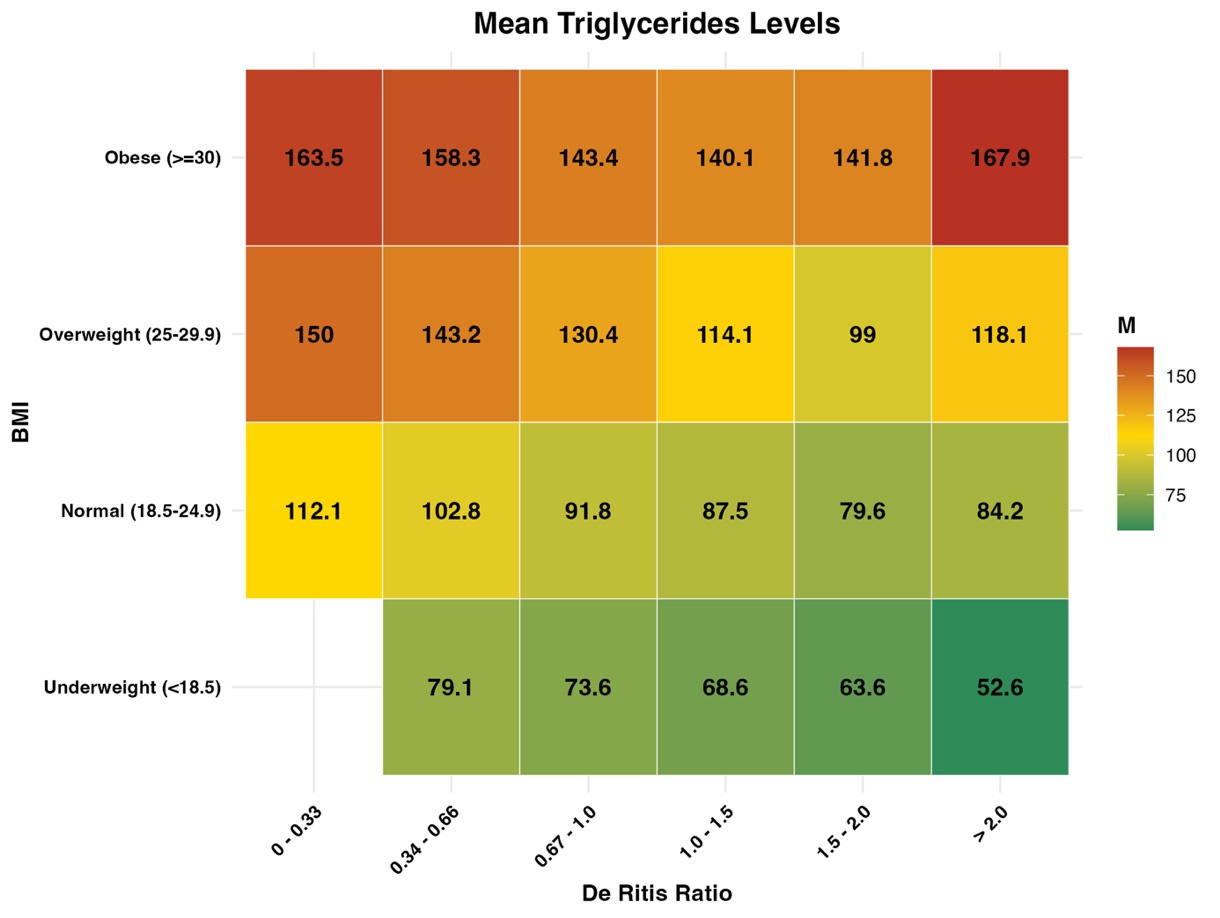
**Supplementary Figure 4.** Mean Triglyceride levels.
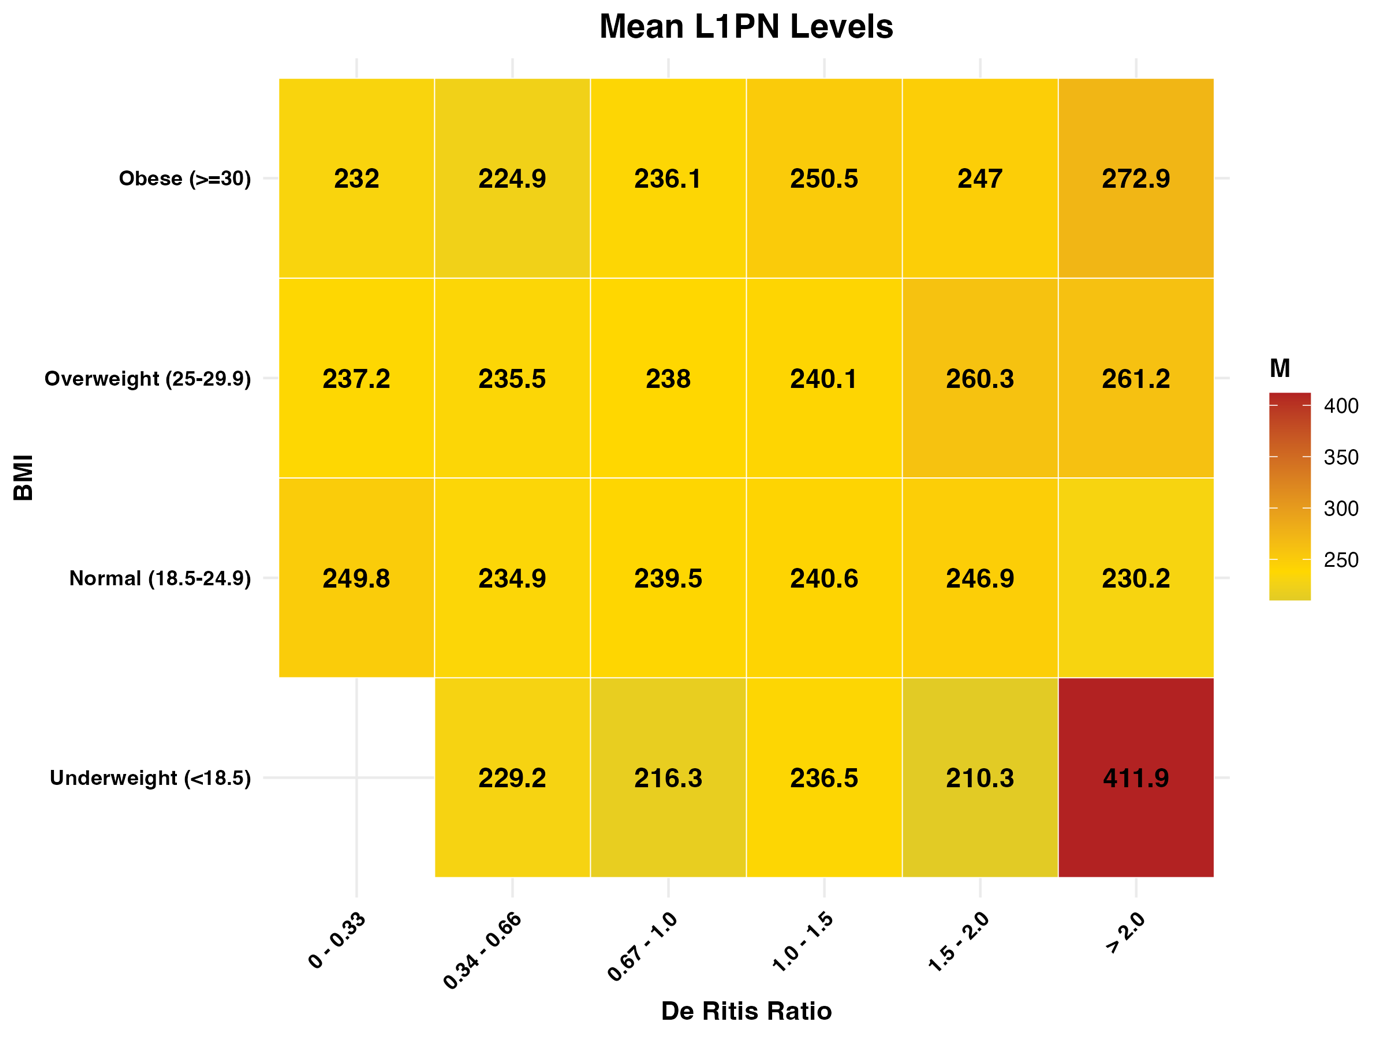


**Supplementary Figure 5.** Mean L1PN concentrations.


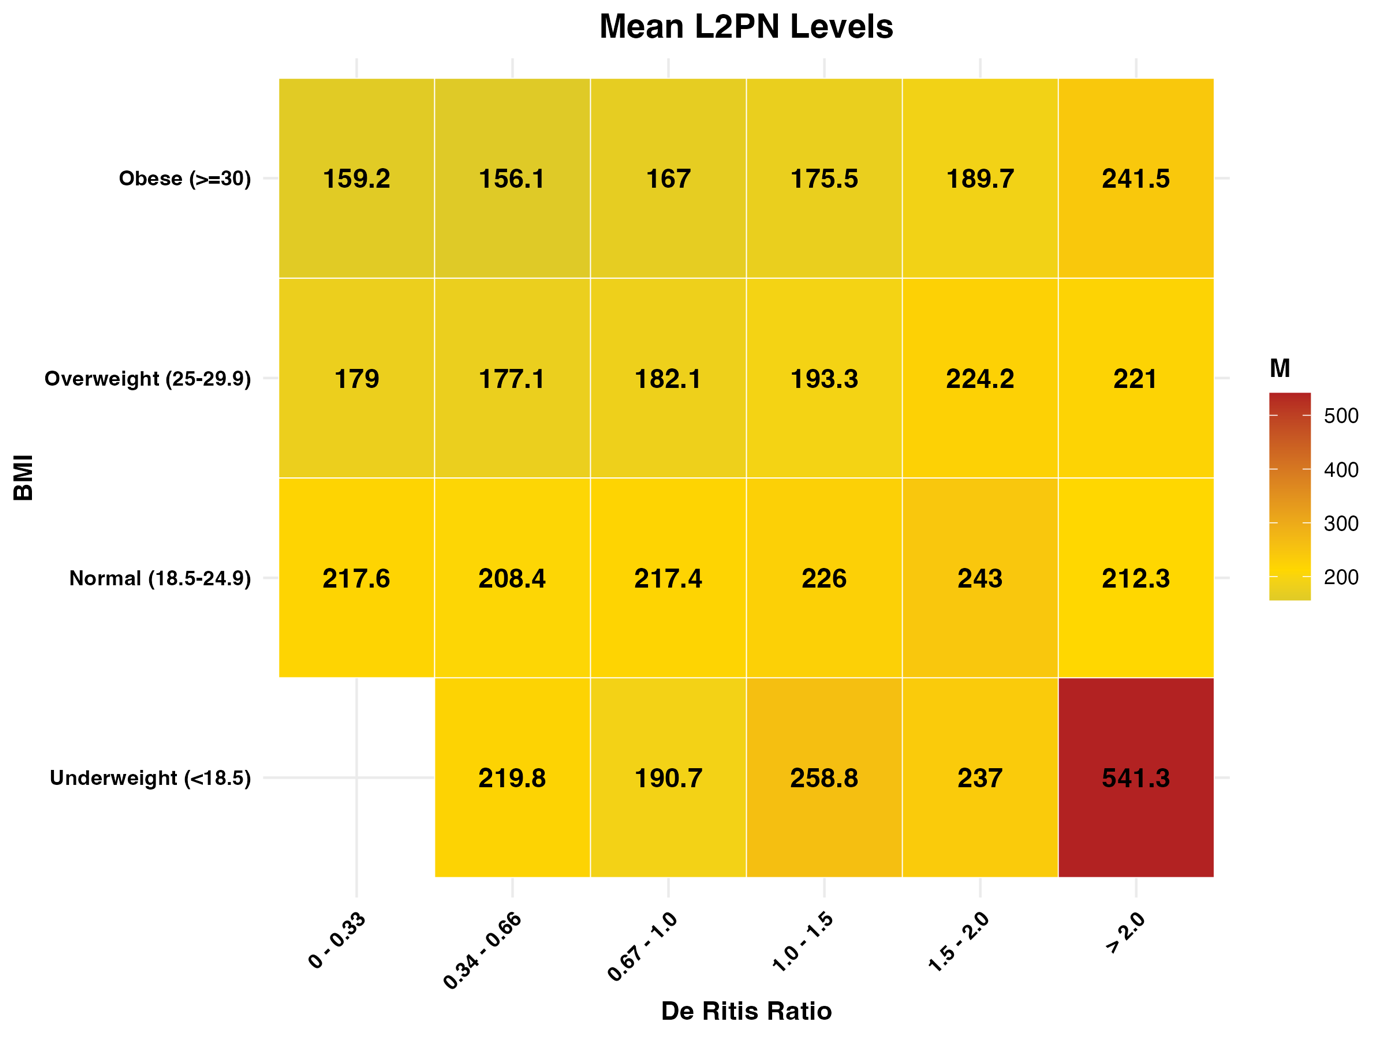


**Supplementary Figure 6.** Mean L2PN concentrations.


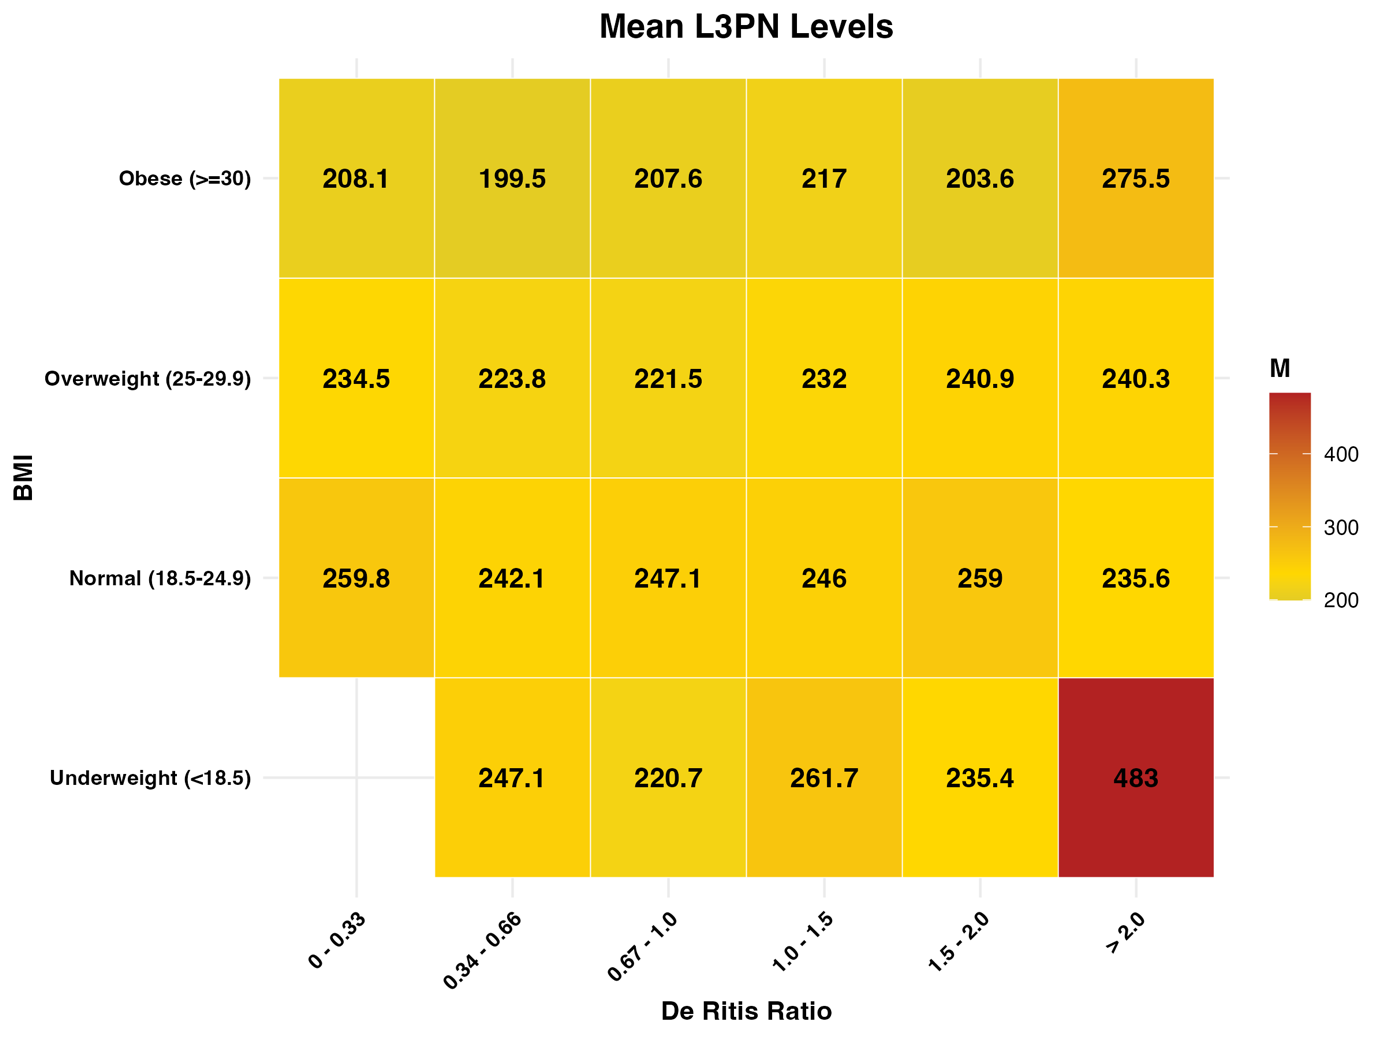
 **Supplementary Figure 7.** Mean L3PN concentrations.


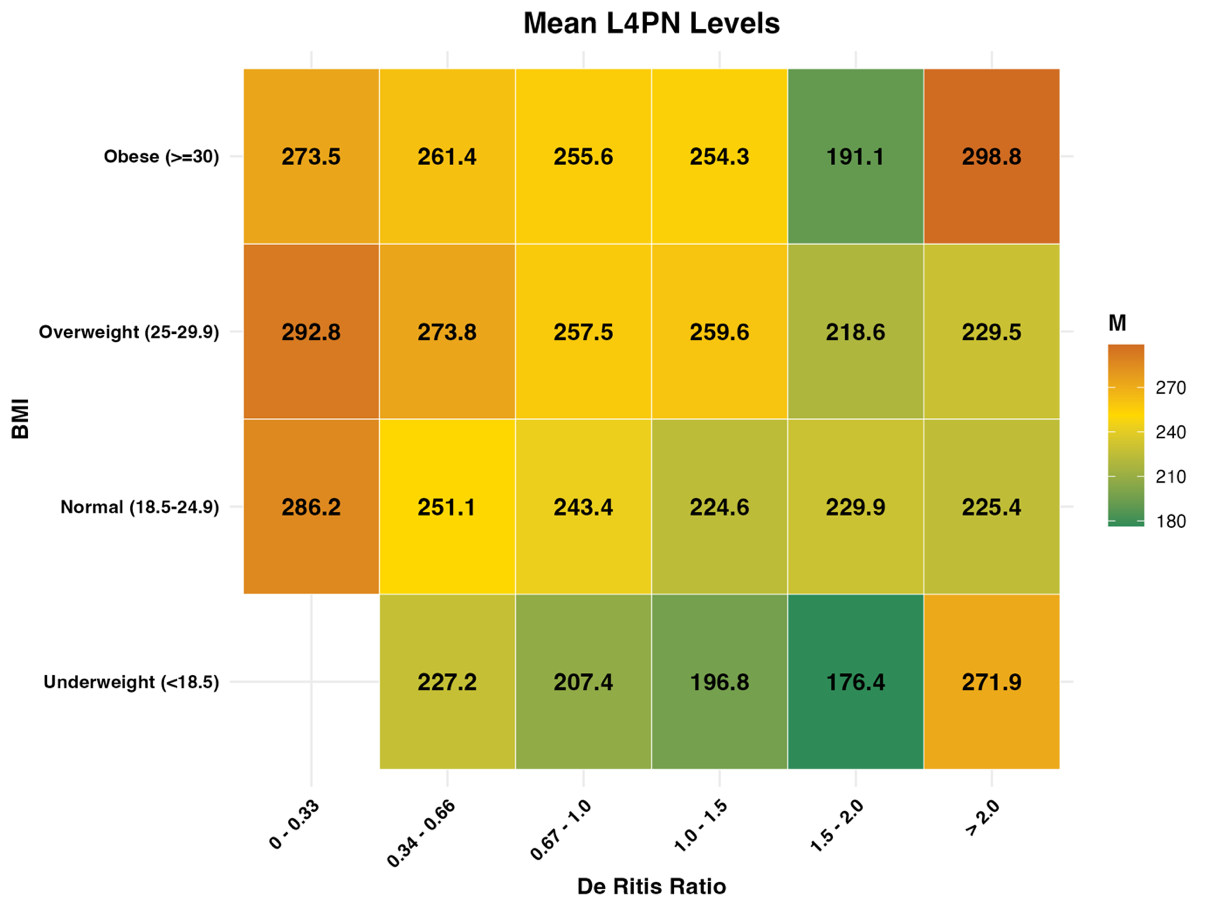
 **Supplementary Figure 8.** Mean L4PN concentrations.


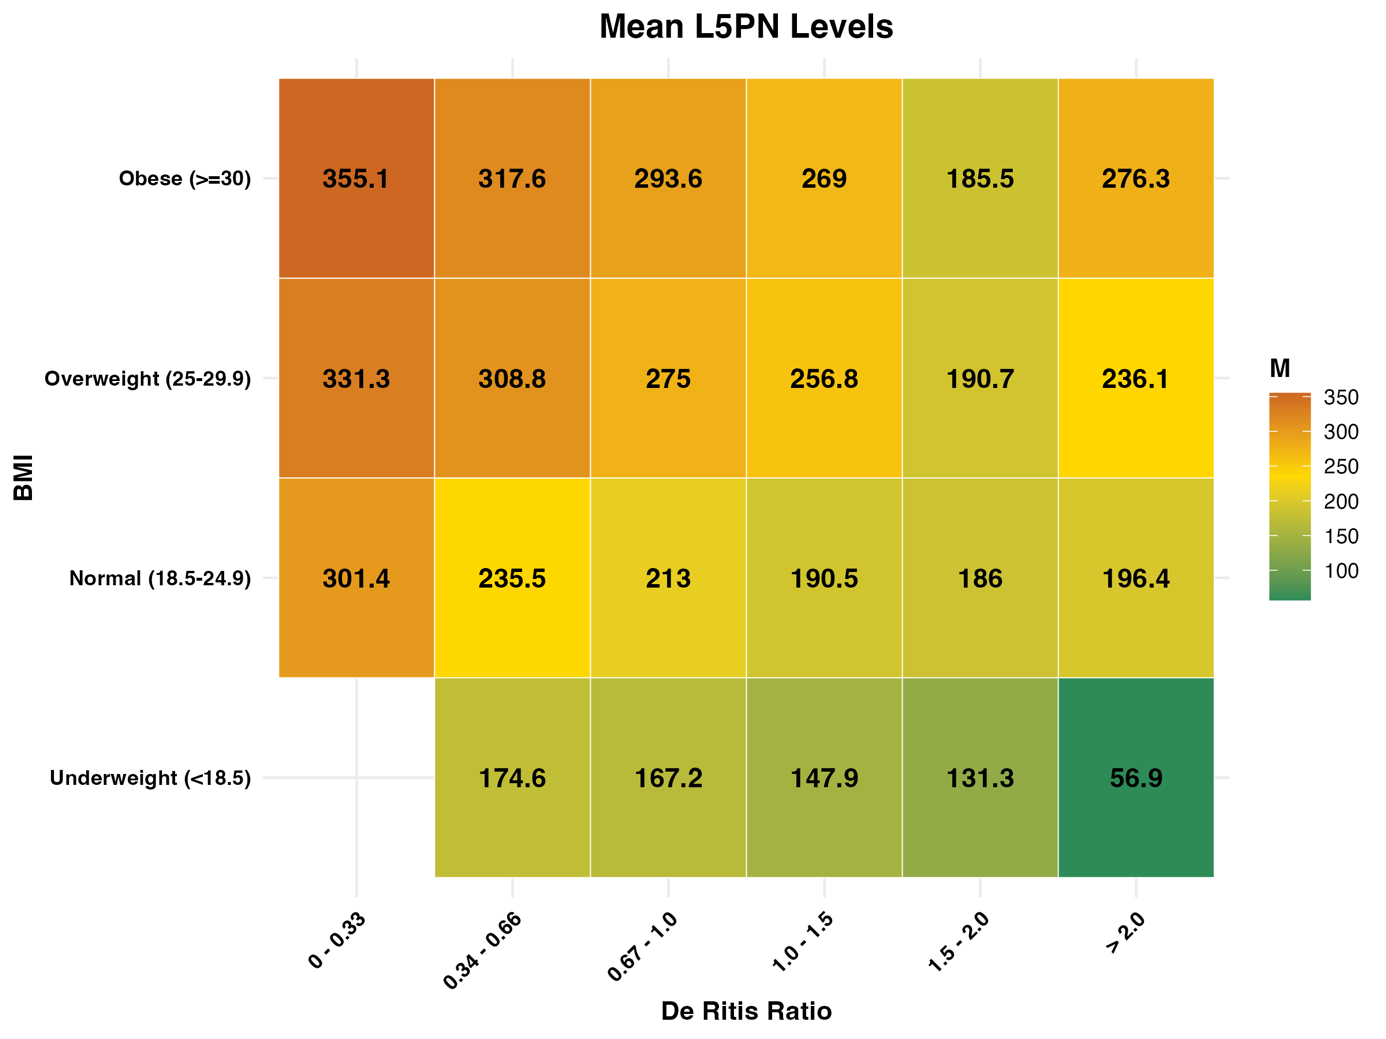
 **Supplementary Figure 9.** Mean L5PN concentrations.
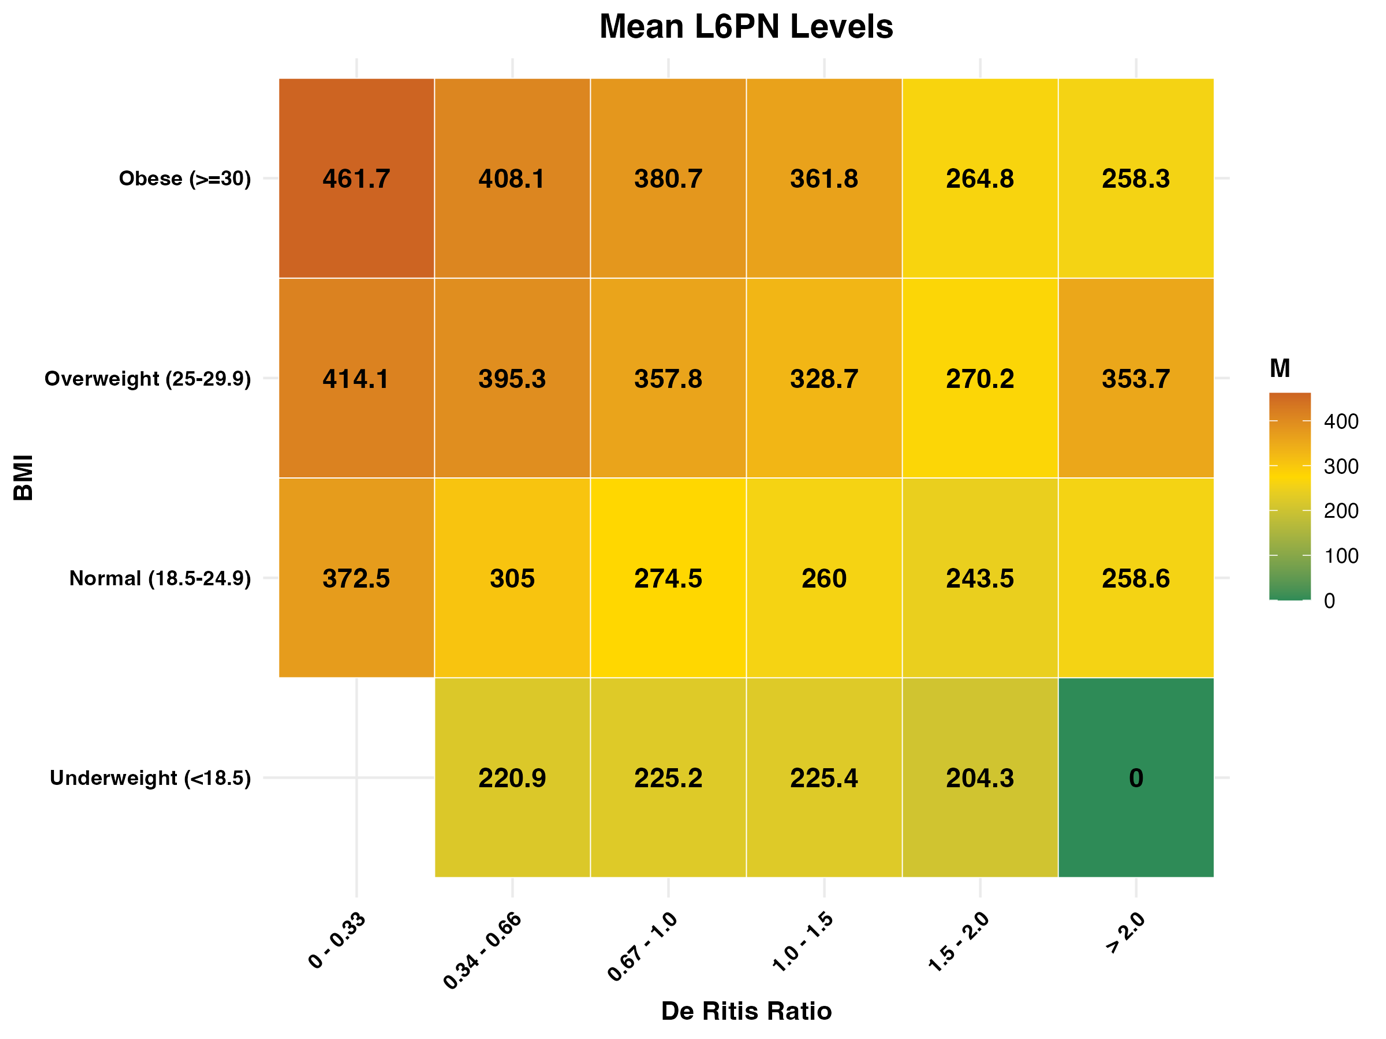
 **Supplementary Figure 10.** Mean L6PN concentrations.
