# Supplementary material
Source: Research Square preprint supplement (doi:10.21203/rs.3.rs-9622101/v1)
Supplement: Supplementary file 2 [file 1f6c638cb4e6a64748e9bf2c.xlsx]

## Sheet: MainCohort_KruskallWallis
Variable	.y.	n	statistic	df	p	method
LDL_C	LDL_C	28380	256.041	5	2.78e-53	Kruskal-Wallis
HDL_C	HDL_C	28380	1310.88	5	2.81e-281	Kruskal-Wallis
Cholesterol	Cholesterol	28380	286.239	5	9.09e-60	Kruskal-Wallis
Triglycerides	Triglycerides	28380	1582.03	5	0	Kruskal-Wallis
L1PN	L1PN	28380	26.0346	5	8.79e-05	Kruskal-Wallis
L2PN	L2PN	28380	617.605	5	3.18e-131	Kruskal-Wallis
L3PN	L3PN	28380	122.338	5	1e-24	Kruskal-Wallis
L4PN	L4PN	28380	324.296	5	5.96e-68	Kruskal-Wallis
L5PN	L5PN	28380	1759.38	5	0	Kruskal-Wallis
L6PN	L6PN	28380	1148.78	5	3.65e-246	Kruskal-Wallis

## Sheet: MainCohort_Bonferroni
Variable	.y.	group1	group2	n1	n2	statistic	p	p.adj	p.adj.signif
LDL_C	LDL_C	0 - 0.33	0.34 - 0.66	846	10849	5231395	1.12e-11	1.68e-10	****
LDL_C	LDL_C	0 - 0.33	0.67 - 1.0	846	10403	5252749	6.43e-21	9.65e-20	****
LDL_C	LDL_C	0 - 0.33	1.0 - 1.5	846	5161	2.7319e+06	8.17e-32	1.23e-30	****
LDL_C	LDL_C	0 - 0.33	1.5 - 2.0	846	880	481374	5.45e-26	8.18e-25	****
LDL_C	LDL_C	0 - 0.33	> 2.0	846	241	129847	8.59e-11	1.29e-09	****
LDL_C	LDL_C	0.34 - 0.66	0.67 - 1.0	10849	10403	59387543	3.77e-11	5.66e-10	****
LDL_C	LDL_C	0.34 - 0.66	1.0 - 1.5	10849	5161	3.10851e+07	1.27e-29	1.91e-28	****
LDL_C	LDL_C	0.34 - 0.66	1.5 - 2.0	10849	880	5495318	7.94e-14	1.19e-12	****
LDL_C	LDL_C	0.34 - 0.66	> 2.0	10849	241	1481147	0.000406	0.006	**
LDL_C	LDL_C	0.67 - 1.0	1.0 - 1.5	10403	5161	28424095	2.18e-09	3.27e-08	****
LDL_C	LDL_C	0.67 - 1.0	1.5 - 2.0	10403	880	5032177	9.47e-07	1.42e-05	****
LDL_C	LDL_C	0.67 - 1.0	> 2.0	10403	241	1356396	0.029	0.438	ns
LDL_C	LDL_C	1.0 - 1.5	1.5 - 2.0	5161	880	2.362e+06	0.057	0.849	ns
LDL_C	LDL_C	1.0 - 1.5	> 2.0	5161	241	636262	0.544	1	ns
LDL_C	LDL_C	1.5 - 2.0	> 2.0	880	241	104336	0.702	1	ns
HDL_C	HDL_C	0 - 0.33	0.34 - 0.66	846	10849	3.98106e+06	1.28e-10	1.92e-09	****
HDL_C	HDL_C	0 - 0.33	0.67 - 1.0	846	10403	3128142	1.41e-44	2.12e-43	****
HDL_C	HDL_C	0 - 0.33	1.0 - 1.5	846	5161	1268142	2.82e-85	4.23e-84	****
HDL_C	HDL_C	0 - 0.33	1.5 - 2.0	846	880	187162	1.68e-71	2.52e-70	****
HDL_C	HDL_C	0 - 0.33	> 2.0	846	241	58087	1.98e-24	2.97e-23	****
HDL_C	HDL_C	0.34 - 0.66	0.67 - 1.0	10849	10403	4.75114e+07	1.48e-88	2.22e-87	****
HDL_C	HDL_C	0.34 - 0.66	1.0 - 1.5	10849	5161	1.98712e+07	3.65e-194	5.47e-193	****
HDL_C	HDL_C	0.34 - 0.66	1.5 - 2.0	10849	880	3.01729e+06	7.41e-74	1.11e-72	****
HDL_C	HDL_C	0.34 - 0.66	> 2.0	10849	241	907102	3.92e-16	5.88e-15	****
HDL_C	HDL_C	0.67 - 1.0	1.0 - 1.5	10403	5161	2.3266e+07	6.71e-42	1.01e-40	****
HDL_C	HDL_C	0.67 - 1.0	1.5 - 2.0	10403	880	3.6182e+06	4.77e-25	7.16e-24	****
HDL_C	HDL_C	0.67 - 1.0	> 2.0	10403	241	1058633	3.57e-05	0.000536	***
HDL_C	HDL_C	1.0 - 1.5	1.5 - 2.0	5161	880	2101984	0.000414	0.006	**
HDL_C	HDL_C	1.0 - 1.5	> 2.0	5161	241	604677	0.467	1	ns
HDL_C	HDL_C	1.5 - 2.0	> 2.0	880	241	110636	0.302	1	ns
Cholesterol	Cholesterol	0 - 0.33	0.34 - 0.66	846	10849	5.10271e+06	5.64e-08	8.46e-07	****
Cholesterol	Cholesterol	0 - 0.33	0.67 - 1.0	846	10403	5149470	1.64e-16	2.46e-15	****
Cholesterol	Cholesterol	0 - 0.33	1.0 - 1.5	846	5161	2700259	1.94e-28	2.91e-27	****
Cholesterol	Cholesterol	0 - 0.33	1.5 - 2.0	846	880	479544	3.52e-25	5.28e-24	****
Cholesterol	Cholesterol	0 - 0.33	> 2.0	846	241	127712	2.06e-09	3.09e-08	****
Cholesterol	Cholesterol	0.34 - 0.66	0.67 - 1.0	10849	10403	5.96925e+07	2.99e-13	4.48e-12	****
Cholesterol	Cholesterol	0.34 - 0.66	1.0 - 1.5	10849	5161	31501107	1.2e-37	1.8e-36	****
Cholesterol	Cholesterol	0.34 - 0.66	1.5 - 2.0	10849	880	5.61529e+06	2.95e-18	4.43e-17	****
Cholesterol	Cholesterol	0.34 - 0.66	> 2.0	10849	241	1.49479e+06	0.000137	0.002	**
Cholesterol	Cholesterol	0.67 - 1.0	1.0 - 1.5	10403	5161	28672940	4.3e-12	6.45e-11	****
Cholesterol	Cholesterol	0.67 - 1.0	1.5 - 2.0	10403	880	5125853	3.38e-09	5.07e-08	****
Cholesterol	Cholesterol	0.67 - 1.0	> 2.0	10403	241	1363112	0.02	0.303	ns
Cholesterol	Cholesterol	1.0 - 1.5	1.5 - 2.0	5161	880	2389680	0.013	0.194	ns
Cholesterol	Cholesterol	1.0 - 1.5	> 2.0	5161	241	634769	0.587	1	ns
Cholesterol	Cholesterol	1.5 - 2.0	> 2.0	880	241	102898	0.48	1	ns
Triglycerides	Triglycerides	0 - 0.33	0.34 - 0.66	846	10849	5.01592e+06	6.41e-06	9.61e-05	****
Triglycerides	Triglycerides	0 - 0.33	0.67 - 1.0	846	10403	5508493	3.17e-34	4.75e-33	****
Triglycerides	Triglycerides	0 - 0.33	1.0 - 1.5	846	5161	3065632	1.81e-79	2.72e-78	****
Triglycerides	Triglycerides	0 - 0.33	1.5 - 2.0	846	880	570104	1.88e-81	2.82e-80	****
Triglycerides	Triglycerides	0 - 0.33	> 2.0	846	241	147642	2.19e-26	3.29e-25	****
Triglycerides	Triglycerides	0.34 - 0.66	0.67 - 1.0	10849	10403	65483015	3.82e-91	5.73e-90	****
Triglycerides	Triglycerides	0.34 - 0.66	1.0 - 1.5	10849	5161	3.68792e+07	1.03e-231	1.55e-230	****
Triglycerides	Triglycerides	0.34 - 0.66	1.5 - 2.0	10849	880	6941478	1.56e-111	2.34e-110	****
Triglycerides	Triglycerides	0.34 - 0.66	> 2.0	10849	241	1785300	2.39e-22	3.58e-21	****
Triglycerides	Triglycerides	0.67 - 1.0	1.0 - 1.5	10403	5161	31164544	3.2e-60	4.8e-59	****
Triglycerides	Triglycerides	0.67 - 1.0	1.5 - 2.0	10403	880	5997820	6.54e-53	9.81e-52	****
Triglycerides	Triglycerides	0.67 - 1.0	> 2.0	10403	241	1522762	1.14e-08	1.71e-07	****
Triglycerides	Triglycerides	1.0 - 1.5	1.5 - 2.0	5161	880	2629645	6.23e-14	9.34e-13	****
Triglycerides	Triglycerides	1.0 - 1.5	> 2.0	5161	241	657825	0.129	1	ns
Triglycerides	Triglycerides	1.5 - 2.0	> 2.0	880	241	95423.5	0.017	0.256	ns
L1PN	L1PN	0 - 0.33	0.34 - 0.66	846	10849	4687140	0.3	1	ns
L1PN	L1PN	0 - 0.33	0.67 - 1.0	846	10403	4.36046e+06	0.66	1	ns
L1PN	L1PN	0 - 0.33	1.0 - 1.5	846	5161	2140214	0.359	1	ns
L1PN	L1PN	0 - 0.33	1.5 - 2.0	846	880	361704	0.309	1	ns
L1PN	L1PN	0 - 0.33	> 2.0	846	241	98644	0.443	1	ns
L1PN	L1PN	0.34 - 0.66	0.67 - 1.0	10849	10403	54719228	0.000129	0.002	**
L1PN	L1PN	0.34 - 0.66	1.0 - 1.5	10849	5161	2.68585e+07	3.17e-05	0.000475	***
L1PN	L1PN	0.34 - 0.66	1.5 - 2.0	10849	880	4.53808e+06	0.015	0.222	ns
L1PN	L1PN	0.34 - 0.66	> 2.0	10849	241	1.23595e+06	0.147	1	ns
L1PN	L1PN	0.67 - 1.0	1.0 - 1.5	10403	5161	2.65558e+07	0.273	1	ns
L1PN	L1PN	0.67 - 1.0	1.5 - 2.0	10403	880	4490207	0.348	1	ns
L1PN	L1PN	0.67 - 1.0	> 2.0	10403	241	1223090	0.518	1	ns
L1PN	L1PN	1.0 - 1.5	1.5 - 2.0	5161	880	2.25102e+06	0.679	1	ns
L1PN	L1PN	1.0 - 1.5	> 2.0	5161	241	613452	0.721	1	ns
L1PN	L1PN	1.5 - 2.0	> 2.0	880	241	105330	0.873	1	ns
L2PN	L2PN	0 - 0.33	0.34 - 0.66	846	10849	4.6142e+06	0.791	1	ns
L2PN	L2PN	0 - 0.33	0.67 - 1.0	846	10403	3987082	5.34e-06	8.01e-05	****
L2PN	L2PN	0 - 0.33	1.0 - 1.5	846	5161	1742505	4.36e-21	6.54e-20	****
L2PN	L2PN	0 - 0.33	1.5 - 2.0	846	880	259549	1.33e-27	2e-26	****
L2PN	L2PN	0 - 0.33	> 2.0	846	241	77356.5	1.08e-08	1.62e-07	****
L2PN	L2PN	0.34 - 0.66	0.67 - 1.0	10849	10403	5.09213e+07	6.75e-35	1.01e-33	****
L2PN	L2PN	0.34 - 0.66	1.0 - 1.5	10849	5161	22310472	4.26e-96	6.39e-95	****
L2PN	L2PN	0.34 - 0.66	1.5 - 2.0	10849	880	3332929	2.72e-50	4.08e-49	****
L2PN	L2PN	0.34 - 0.66	> 2.0	10849	241	989974	1.08e-10	1.62e-09	****
L2PN	L2PN	0.67 - 1.0	1.0 - 1.5	10403	5161	2.39912e+07	2.96e-27	4.44e-26	****
L2PN	L2PN	0.67 - 1.0	1.5 - 2.0	10403	880	3.63411e+06	2.81e-24	4.22e-23	****
L2PN	L2PN	0.67 - 1.0	> 2.0	10403	241	1.06835e+06	8.59e-05	0.001	**
L2PN	L2PN	1.0 - 1.5	1.5 - 2.0	5161	880	2.04434e+06	2.17e-06	3.26e-05	****
L2PN	L2PN	1.0 - 1.5	> 2.0	5161	241	595264	0.26	1	ns
L2PN	L2PN	1.5 - 2.0	> 2.0	880	241	111847	0.192	1	ns
L3PN	L3PN	0 - 0.33	0.34 - 0.66	846	10849	4822273	0.014	0.206	ns
L3PN	L3PN	0 - 0.33	0.67 - 1.0	846	10403	4.41909e+06	0.838	1	ns
L3PN	L3PN	0 - 0.33	1.0 - 1.5	846	5161	2094970	0.059	0.891	ns
L3PN	L3PN	0 - 0.33	1.5 - 2.0	846	880	347668	0.018	0.264	ns
L3PN	L3PN	0 - 0.33	> 2.0	846	241	96548	0.21	1	ns
L3PN	L3PN	0.34 - 0.66	0.67 - 1.0	10849	10403	5.36987e+07	9.87e-10	1.48e-08	****
L3PN	L3PN	0.34 - 0.66	1.0 - 1.5	10849	5161	25335773	2.2e-22	3.3e-21	****
L3PN	L3PN	0.34 - 0.66	1.5 - 2.0	10849	880	4.19078e+06	1.61e-09	2.42e-08	****
L3PN	L3PN	0.34 - 0.66	> 2.0	10849	241	1167223	0.004	0.066	ns
L3PN	L3PN	0.67 - 1.0	1.0 - 1.5	10403	5161	25586301	1.85e-06	2.78e-05	****
L3PN	L3PN	0.67 - 1.0	1.5 - 2.0	10403	880	4239091	0.000267	0.004	**
L3PN	L3PN	0.67 - 1.0	> 2.0	10403	241	1.17896e+06	0.114	1	ns
L3PN	L3PN	1.0 - 1.5	1.5 - 2.0	5161	880	2211574	0.215	1	ns
L3PN	L3PN	1.0 - 1.5	> 2.0	5161	241	613858	0.734	1	ns
L3PN	L3PN	1.5 - 2.0	> 2.0	880	241	107328	0.772	1	ns
L4PN	L4PN	0 - 0.33	0.34 - 0.66	846	10849	5059696	6.52e-07	9.78e-06	****
L4PN	L4PN	0 - 0.33	0.67 - 1.0	846	10403	5.10312e+06	1.03e-14	1.54e-13	****
L4PN	L4PN	0 - 0.33	1.0 - 1.5	846	5161	2685240	6.62e-27	9.93e-26	****
L4PN	L4PN	0 - 0.33	1.5 - 2.0	846	880	487447	8.96e-29	1.34e-27	****
L4PN	L4PN	0 - 0.33	> 2.0	846	241	130381	3.74e-11	5.61e-10	****
L4PN	L4PN	0.34 - 0.66	0.67 - 1.0	10849	10403	5.96078e+07	1.2e-12	1.8e-11	****
L4PN	L4PN	0.34 - 0.66	1.0 - 1.5	10849	5161	31616023	4.83e-40	7.24e-39	****
L4PN	L4PN	0.34 - 0.66	1.5 - 2.0	10849	880	5784998	1.19e-25	1.79e-24	****
L4PN	L4PN	0.34 - 0.66	> 2.0	10849	241	1546106	1.19e-06	1.78e-05	****
L4PN	L4PN	0.67 - 1.0	1.0 - 1.5	10403	5161	28859176	2.3e-14	3.45e-13	****
L4PN	L4PN	0.67 - 1.0	1.5 - 2.0	10403	880	5.31111e+06	2.6e-15	3.9e-14	****
L4PN	L4PN	0.67 - 1.0	> 2.0	10403	241	1.41948e+06	0.000434	0.007	**
L4PN	L4PN	1.0 - 1.5	1.5 - 2.0	5161	880	2465694	4.61e-05	0.000692	***
L4PN	L4PN	1.0 - 1.5	> 2.0	5161	241	658886	0.118	1	ns
L4PN	L4PN	1.5 - 2.0	> 2.0	880	241	103382	0.551	1	ns
L5PN	L5PN	0 - 0.33	0.34 - 0.66	846	10849	5.38628e+06	3.51e-17	5.26e-16	****
L5PN	L5PN	0 - 0.33	0.67 - 1.0	846	10403	5.89913e+06	3.74e-61	5.61e-60	****
L5PN	L5PN	0 - 0.33	1.0 - 1.5	846	5161	3260317	1.87e-117	2.8e-116	****
L5PN	L5PN	0 - 0.33	1.5 - 2.0	846	880	598200	1.21e-105	1.82e-104	****
L5PN	L5PN	0 - 0.33	> 2.0	846	241	153086	1.26e-32	1.89e-31	****
L5PN	L5PN	0.34 - 0.66	0.67 - 1.0	10849	10403	65894416	1.94e-99	2.91e-98	****
L5PN	L5PN	0.34 - 0.66	1.0 - 1.5	10849	5161	3.71855e+07	8.13e-248	1.22e-246	****
L5PN	L5PN	0.34 - 0.66	1.5 - 2.0	10849	880	6921709	1.52e-109	2.28e-108	****
L5PN	L5PN	0.34 - 0.66	> 2.0	10849	241	1758263	4.58e-20	6.87e-19	****
L5PN	L5PN	0.67 - 1.0	1.0 - 1.5	10403	5161	31363144	1.03e-65	1.55e-64	****
L5PN	L5PN	0.67 - 1.0	1.5 - 2.0	10403	880	5.94084e+06	6.84e-49	1.03e-47	****
L5PN	L5PN	0.67 - 1.0	> 2.0	10403	241	1.4983e+06	2.11e-07	3.16e-06	****
L5PN	L5PN	1.0 - 1.5	1.5 - 2.0	5161	880	2.5688e+06	4.64e-10	6.96e-09	****
L5PN	L5PN	1.0 - 1.5	> 2.0	5161	241	644033	0.35	1	ns
L5PN	L5PN	1.5 - 2.0	> 2.0	880	241	96563	0.033	0.5	ns
L6PN	L6PN	0 - 0.33	0.34 - 0.66	846	10849	5.16035e+06	1.55e-09	2.32e-08	****
L6PN	L6PN	0 - 0.33	0.67 - 1.0	846	10403	5.56479e+06	1.3e-37	1.95e-36	****
L6PN	L6PN	0 - 0.33	1.0 - 1.5	846	5161	3043632	1.2e-75	1.8e-74	****
L6PN	L6PN	0 - 0.33	1.5 - 2.0	846	880	551758	2.23e-67	3.34e-66	****
L6PN	L6PN	0 - 0.33	> 2.0	846	241	142237	7.14e-21	1.07e-19	****
L6PN	L6PN	0.34 - 0.66	0.67 - 1.0	10849	10403	6.42217e+07	5.3e-68	7.95e-67	****
L6PN	L6PN	0.34 - 0.66	1.0 - 1.5	10849	5161	35547035	5.26e-168	7.89e-167	****
L6PN	L6PN	0.34 - 0.66	1.5 - 2.0	10849	880	6481433	6.07e-70	9.11e-69	****
L6PN	L6PN	0.34 - 0.66	> 2.0	10849	241	1671843	1.21e-13	1.81e-12	****
L6PN	L6PN	0.67 - 1.0	1.0 - 1.5	10403	5161	30519708	4.46e-44	6.69e-43	****
L6PN	L6PN	0.67 - 1.0	1.5 - 2.0	10403	880	5619874	2.69e-29	4.04e-28	****
L6PN	L6PN	0.67 - 1.0	> 2.0	10403	241	1.44586e+06	4.55e-05	0.000682	***
L6PN	L6PN	1.0 - 1.5	1.5 - 2.0	5161	880	2473250	2.31e-05	0.000346	***
L6PN	L6PN	1.0 - 1.5	> 2.0	5161	241	637394	0.513	1	ns
L6PN	L6PN	1.5 - 2.0	> 2.0	880	241	100275	0.195	1	ns

## Sheet: MainCohort_Spearman_Rvalue
Var	Age	De Ritis Ratio	LDL-C	HDL-C	Cholesterol	Triglycerides	L1PN	L2PN	L3PN	L4PN	L5PN	L6PN
Age	1	0.0311557	0.126758	0.0234877	0.18803	0.214661	0.186503	-0.0803561	0.000271739	0.122574	0.19991	0.204902
De Ritis Ratio	0.0311557	1	-0.0945635	0.229376	-0.101818	-0.247998	0.0303574	0.151295	0.0650771	-0.108069	-0.262831	-0.213222
LDL-C	0.126758	-0.0945635	1	0.120019	0.891295	0.168531	0.606643	0.525432	0.782201	0.840551	0.60885	0.327614
HDL-C	0.0234877	0.229376	0.120019	1	0.159293	-0.492909	0.21482	0.565296	0.373302	-0.0729196	-0.450952	-0.380096
Cholesterol	0.18803	-0.101818	0.891295	0.159293	1	0.389066	0.736513	0.394735	0.598114	0.682278	0.599778	0.434983
Triglycerides	0.214661	-0.247998	0.168531	-0.492909	0.389066	1	0.260185	-0.399062	-0.213518	0.21695	0.576804	0.541358
L1PN	0.186503	0.0303574	0.606643	0.21482	0.736513	0.260185	1	0.503983	0.559053	0.451415	0.178713	0.0312009
L2PN	-0.0803561	0.151295	0.525432	0.565296	0.394735	-0.399062	0.503983	1	0.829752	0.308643	-0.235622	-0.378445
L3PN	0.000271739	0.0650771	0.782201	0.373302	0.598114	-0.213518	0.559053	0.829752	1	0.729514	0.0989664	-0.215998
L4PN	0.122574	-0.108069	0.840551	-0.0729196	0.682278	0.21695	0.451415	0.308643	0.729514	1	0.622615	0.184938
L5PN	0.19991	-0.262831	0.60885	-0.450952	0.599778	0.576804	0.178713	-0.235622	0.0989664	0.622615	1	0.798462
L6PN	0.204902	-0.213222	0.327614	-0.380096	0.434983	0.541358	0.0312009	-0.378445	-0.215998	0.184938	0.798462	1

## Sheet: MainCohort_Spearman_pValue
Var	Age	De Ritis Ratio	LDL-C	HDL-C	Cholesterol	Triglycerides	L1PN	L2PN	L3PN	L4PN	L5PN	L6PN
Age		1.5239e-07	0	7.58375e-05	0	0	0	0	0.963489	0	0	0
De Ritis Ratio	1.5239e-07		0	0	0	0	3.13619e-07	0	0	0	0	0
LDL-C	0	0		0	0	0	0	0	0	0	0	0
HDL-C	7.58375e-05	0	0		0	0	0	0	0	0	0	0
Cholesterol	0	0	0	0		0	0	0	0	0	0	0
Triglycerides	0	0	0	0	0		0	0	0	0	0	0
L1PN	0	3.13619e-07	0	0	0	0		0	0	0	0	1.46219e-07
L2PN	0	0	0	0	0	0	0		0	0	0	0
L3PN	0.963489	0	0	0	0	0	0	0		0	0	0
L4PN	0	0	0	0	0	0	0	0	0		0	0
L5PN	0	0	0	0	0	0	0	0	0	0		0
L6PN	0	0	0	0	0	0	1.46219e-07	0	0	0	0

## Sheet: SubCohort_Kruskall-Wallis
.y.	n	statistic	df	p	method	Var	Group
LDL_C	7153	51.5121	3	3.81e-11	Kruskal-Wallis	LDL_C	BMI
HDL_C	7153	986.306	3	1.68e-213	Kruskal-Wallis	HDL_C	BMI
Cholesterol	7153	49.7559	3	9.01e-11	Kruskal-Wallis	Cholesterol	BMI
Triglycerides	7153	989.199	3	3.96e-214	Kruskal-Wallis	Triglycerides	BMI
L1PN	7153	6.95044	3	0.0735	Kruskal-Wallis	L1PN	BMI
L2PN	7153	534.315	3	1.74e-115	Kruskal-Wallis	L2PN	BMI
L3PN	7153	184.126	3	1.13e-39	Kruskal-Wallis	L3PN	BMI
L4PN	7153	113.741	3	1.72e-24	Kruskal-Wallis	L4PN	BMI
L5PN	7153	817.224	3	7.96e-177	Kruskal-Wallis	L5PN	BMI
L6PN	7153	634.25	3	3.78e-137	Kruskal-Wallis	L6PN	BMI

## Sheet: SubCohort_Bonferroni
.y.	group1	group2	n1	n2	statistic	p	p.adj	p.adj.signif	Var	Group
LDL_C	Underweight (<18.5)	Normal (18.5-24.9)	118	2713	131854	0.001	0.007	**	LDL_C	BMI
LDL_C	Underweight (<18.5)	Overweight (25-29.9)	118	2969	129444	1.47e-06	8.82e-06	****	LDL_C	BMI
LDL_C	Underweight (<18.5)	Obese (>=30)	118	1353	64525	0.000545	0.003	**	LDL_C	BMI
LDL_C	Normal (18.5-24.9)	Overweight (25-29.9)	2713	2969	3674132	1.06e-08	6.36e-08	****	LDL_C	BMI
LDL_C	Normal (18.5-24.9)	Obese (>=30)	2713	1353	1.80613e+06	0.408	1	ns	LDL_C	BMI
LDL_C	Overweight (25-29.9)	Obese (>=30)	2969	1353	2151085	0.000179	0.001	**	LDL_C	BMI
HDL_C	Underweight (<18.5)	Normal (18.5-24.9)	118	2713	190920	0.000386	0.002	**	HDL_C	BMI
HDL_C	Underweight (<18.5)	Overweight (25-29.9)	118	2969	272312	1.45e-24	8.7e-24	****	HDL_C	BMI
HDL_C	Underweight (<18.5)	Obese (>=30)	118	1353	132253	2.24e-32	1.34e-31	****	HDL_C	BMI
HDL_C	Normal (18.5-24.9)	Overweight (25-29.9)	2713	2969	5.57656e+06	7.91e-139	4.75e-138	****	HDL_C	BMI
HDL_C	Normal (18.5-24.9)	Obese (>=30)	2713	1353	2749926	3.06e-148	1.84e-147	****	HDL_C	BMI
HDL_C	Overweight (25-29.9)	Obese (>=30)	2969	1353	2.25526e+06	8.82e-11	5.29e-10	****	HDL_C	BMI
Cholesterol	Underweight (<18.5)	Normal (18.5-24.9)	118	2713	133224	0.002	0.012	*	Cholesterol	BMI
Cholesterol	Underweight (<18.5)	Overweight (25-29.9)	118	2969	130288	2.28e-06	1.37e-05	****	Cholesterol	BMI
Cholesterol	Underweight (<18.5)	Obese (>=30)	118	1353	63350.5	0.000197	0.001	**	Cholesterol	BMI
Cholesterol	Normal (18.5-24.9)	Overweight (25-29.9)	2713	2969	3.66886e+06	6.4e-09	3.84e-08	****	Cholesterol	BMI
Cholesterol	Normal (18.5-24.9)	Obese (>=30)	2713	1353	1.76371e+06	0.042	0.254	ns	Cholesterol	BMI
Cholesterol	Overweight (25-29.9)	Obese (>=30)	2969	1353	2.11074e+06	0.007	0.043	*	Cholesterol	BMI
Triglycerides	Underweight (<18.5)	Normal (18.5-24.9)	118	2713	113858	1.06e-07	6.36e-07	****	Triglycerides	BMI
Triglycerides	Underweight (<18.5)	Overweight (25-29.9)	118	2969	66485	2.44e-30	1.46e-29	****	Triglycerides	BMI
Triglycerides	Underweight (<18.5)	Obese (>=30)	118	1353	21428	9.23e-40	5.54e-39	****	Triglycerides	BMI
Triglycerides	Normal (18.5-24.9)	Overweight (25-29.9)	2713	2969	2541161	5.9e-128	3.54e-127	****	Triglycerides	BMI
Triglycerides	Normal (18.5-24.9)	Obese (>=30)	2713	1353	911658	3.63e-151	2.18e-150	****	Triglycerides	BMI
Triglycerides	Overweight (25-29.9)	Obese (>=30)	2969	1353	1.71484e+06	1.16e-14	6.96e-14	****	Triglycerides	BMI
L1PN	Underweight (<18.5)	Normal (18.5-24.9)	118	2713	146989	0.132	0.792	ns	L1PN	BMI
L1PN	Underweight (<18.5)	Overweight (25-29.9)	118	2969	162804	0.193	1	ns	L1PN	BMI
L1PN	Underweight (<18.5)	Obese (>=30)	118	1353	76741.5	0.486	1	ns	L1PN	BMI
L1PN	Normal (18.5-24.9)	Overweight (25-29.9)	2713	2969	4066184	0.531	1	ns	L1PN	BMI
L1PN	Normal (18.5-24.9)	Obese (>=30)	2713	1353	1916234	0.022	0.131	ns	L1PN	BMI
L1PN	Overweight (25-29.9)	Obese (>=30)	2969	1353	2.07634e+06	0.075	0.448	ns	L1PN	BMI
L2PN	Underweight (<18.5)	Normal (18.5-24.9)	118	2713	170910	0.212	1	ns	L2PN	BMI
L2PN	Underweight (<18.5)	Overweight (25-29.9)	118	2969	231420	3.14e-09	1.88e-08	****	L2PN	BMI
L2PN	Underweight (<18.5)	Obese (>=30)	118	1353	116540	1.08e-16	6.48e-16	****	L2PN	BMI
L2PN	Normal (18.5-24.9)	Overweight (25-29.9)	2713	2969	5072838	2.9e-64	1.74e-63	****	L2PN	BMI
L2PN	Normal (18.5-24.9)	Obese (>=30)	2713	1353	2568720	5.06e-96	3.04e-95	****	L2PN	BMI
L2PN	Overweight (25-29.9)	Obese (>=30)	2969	1353	2281228	7.58e-13	4.55e-12	****	L2PN	BMI
L3PN	Underweight (<18.5)	Normal (18.5-24.9)	118	2713	157193	0.741	1	ns	L3PN	BMI
L3PN	Underweight (<18.5)	Overweight (25-29.9)	118	2969	196253	0.026	0.158	ns	L3PN	BMI
L3PN	Underweight (<18.5)	Obese (>=30)	118	1353	99069.5	1.37e-05	8.22e-05	****	L3PN	BMI
L3PN	Normal (18.5-24.9)	Overweight (25-29.9)	2713	2969	4557377	9.48e-18	5.69e-17	****	L3PN	BMI
L3PN	Normal (18.5-24.9)	Obese (>=30)	2713	1353	2296360	4.85e-39	2.91e-38	****	L3PN	BMI
L3PN	Overweight (25-29.9)	Obese (>=30)	2969	1353	2.24055e+06	1.07e-09	6.42e-09	****	L3PN	BMI
L4PN	Underweight (<18.5)	Normal (18.5-24.9)	118	2713	126278	0.000101	0.000606	***	L4PN	BMI
L4PN	Underweight (<18.5)	Overweight (25-29.9)	118	2969	113628	9.08e-11	5.45e-10	****	L4PN	BMI
L4PN	Underweight (<18.5)	Obese (>=30)	118	1353	54439.5	9.66e-09	5.8e-08	****	L4PN	BMI
L4PN	Normal (18.5-24.9)	Overweight (25-29.9)	2713	2969	3.47485e+06	3.65e-19	2.19e-18	****	L4PN	BMI
L4PN	Normal (18.5-24.9)	Obese (>=30)	2713	1353	1.63537e+06	1.43e-08	8.58e-08	****	L4PN	BMI
L4PN	Overweight (25-29.9)	Obese (>=30)	2969	1353	2057538	0.198	1	ns	L4PN	BMI
L5PN	Underweight (<18.5)	Normal (18.5-24.9)	118	2713	106522	7.27e-10	4.36e-09	****	L5PN	BMI
L5PN	Underweight (<18.5)	Overweight (25-29.9)	118	2969	63220	4.37e-32	2.62e-31	****	L5PN	BMI
L5PN	Underweight (<18.5)	Obese (>=30)	118	1353	25081	3.76e-35	2.26e-34	****	L5PN	BMI
L5PN	Normal (18.5-24.9)	Overweight (25-29.9)	2713	2969	2.59638e+06	9.07e-119	5.44e-118	****	L5PN	BMI
L5PN	Normal (18.5-24.9)	Obese (>=30)	2713	1353	1061200	8.98e-107	5.39e-106	****	L5PN	BMI
L5PN	Overweight (25-29.9)	Obese (>=30)	2969	1353	1847781	2.38e-05	0.000143	***	L5PN	BMI
L6PN	Underweight (<18.5)	Normal (18.5-24.9)	118	2713	120910	6.64e-06	3.98e-05	****	L6PN	BMI
L6PN	Underweight (<18.5)	Overweight (25-29.9)	118	2969	83944.5	7.41e-22	4.45e-21	****	L6PN	BMI
L6PN	Underweight (<18.5)	Obese (>=30)	118	1353	32708.5	1.8e-26	1.08e-25	****	L6PN	BMI
L6PN	Normal (18.5-24.9)	Overweight (25-29.9)	2713	2969	2789801	2.54e-89	1.52e-88	****	L6PN	BMI
L6PN	Normal (18.5-24.9)	Obese (>=30)	2713	1353	1123012	1.06e-90	6.36e-90	****	L6PN	BMI
L6PN	Overweight (25-29.9)	Obese (>=30)	2969	1353	1.83682e+06	6.37e-06	3.82e-05	****	L6PN	BMI

## Sheet: Subcohort_Spearman_Rvalue
Var	De Ritis Ratio	BMI	Age	LDL_C	HDL_C	Cholesterol	Triglycerides	L1PN	L2PN	L3PN	L4PN	L5PN	L6PN
De Ritis Ratio	1	-0.25832	0.0547877	-0.0938043	0.243704	-0.080635	-0.228666	0.0466113	0.150892	0.0581905	-0.120802	-0.256586	-0.196692
BMI	-0.25832	1	0.218588	0.0460801	-0.404317	0.0589013	0.404296	-0.0200433	-0.302482	-0.171617	0.121949	0.355658	0.313229
Age	0.0547877	0.218588	1	0.0963854	0.0328359	0.165034	0.200922	0.152874	-0.100423	-0.028621	0.102006	0.181672	0.196995
LDL_C	-0.0938043	0.0460801	0.0963854	1	0.106479	0.890596	0.164375	0.595498	0.509713	0.772233	0.835913	0.595869	0.321035
HDL_C	0.243704	-0.404317	0.0328359	0.106479	1	0.15678	-0.498972	0.215623	0.574121	0.374601	-0.0983212	-0.468675	-0.383702
Cholesterol	-0.080635	0.0589013	0.165034	0.890596	0.15678	1	0.384161	0.728729	0.370503	0.586587	0.678533	0.585641	0.424267
Triglycerides	-0.228666	0.404296	0.200922	0.164375	-0.498972	0.384161	1	0.253666	-0.43709	-0.234521	0.230974	0.583076	0.538836
L1PN	0.0466113	-0.0200433	0.152874	0.595498	0.215623	0.728729	0.253666	1	0.487239	0.542932	0.42824	0.155371	0.0100083
L2PN	0.150892	-0.302482	-0.100423	0.509713	0.574121	0.370503	-0.43709	0.487239	1	0.839992	0.284027	-0.276214	-0.412679
L3PN	0.0581905	-0.171617	-0.028621	0.772233	0.374601	0.586587	-0.234521	0.542932	0.839992	1	0.702826	0.0706766	-0.2353
L4PN	-0.120802	0.121949	0.102006	0.835913	-0.0983212	0.678533	0.230974	0.42824	0.284027	0.702826	1	0.633736	0.195765
L5PN	-0.256586	0.355658	0.181672	0.595869	-0.468675	0.585641	0.583076	0.155371	-0.276214	0.0706766	0.633736	1	0.796819
L6PN	-0.196692	0.313229	0.196995	0.321035	-0.383702	0.424267	0.538836	0.0100083	-0.412679	-0.2353	0.195765	0.796819	1

## Sheet: Subcohort_Spearman_pValue
Var	De Ritis Ratio	BMI	Age	LDL_C	HDL_C	Cholesterol	Triglycerides	L1PN	L2PN	L3PN	L4PN	L5PN	L6PN
De Ritis Ratio		0	3.54591e-06	1.77636e-15	0	8.51141e-12	0	8.02604e-05	0	8.44476e-07	0	0	0
BMI	0		0	9.67387e-05	0	6.1942e-07	0	0.0900671	0	0	0	0	0
Age	3.54591e-06	0		4.44089e-16	0.00548004	0	0	0	0	0.0154904	0	0	0
LDL_C	1.77636e-15	9.67387e-05	4.44089e-16		0	0	0	0	0	0	0	0	0
HDL_C	0	0	0.00548004	0		0	0	0	0	0	0	0	0
Cholesterol	8.51141e-12	6.1942e-07	0	0	0		0	0	0	0	0	0	0
Triglycerides	0	0	0	0	0	0		0	0	0	0	0	0
L1PN	8.02604e-05	0.0900671	0	0	0	0	0		0	0	0	0	0.397368
L2PN	0	0	0	0	0	0	0	0		0	0	0	0
L3PN	8.44476e-07	0	0.0154904	0	0	0	0	0	0		0	2.17801e-09	0
L4PN	0	0	0	0	0	0	0	0	0	0		0	0
L5PN	0	0	0	0	0	0	0	0	0	2.17801e-09	0		0
L6PN	0	0	0	0	0	0	0	0.397368	0	0	0	0

## Sheet: Regression
Parameter	OR	CI_Lower	CI_Upper	p_value	Significance
L5PN	1.43476	1.36593	1.50757	1.17355e-46	****
L6PN	1.3058	1.24291	1.37254	5.38496e-26	****
Triglycerides	1.28442	1.218	1.35608	6.46979e-20	****
L4PN	1.19496	1.1432	1.24924	3.49818e-15	****
LDL_C	1.17286	1.12202	1.2262	1.92033e-12	****
Cholesterol	1.17017	1.1191	1.22375	5.50661e-12	****
L1PN	1.01943	0.97452	1.0665	0.402926	ns
L3PN	0.985013	0.941483	1.03057	0.512617	ns
L2PN	0.873844	0.833808	0.915739	1.69472e-08	****
HDL_C	0.786339	0.747535	0.827044	1.13202e-20	****
